# Supplementary material for: Group 12 metal zwitterionic thiolate compounds: preparation and structural characterization
Source: Royal Society of Chemistry journal article supplement (doi:10.1039/c2dt30313b), 2012-01-01
Supplement: c2dt30313b.pdf [file c2dt30313b.pdf]

## Electronic Supplementary Information

### Group 12 metal zwitterionic thiolate compounds: preparation and 5 structural characterization

Xiao-Yan Tang,<sup>a,b,c</sup> Rong-Xin Yuan,<sup>c</sup> Jin-Xiang Chem,<sup>d</sup> Wei Zhao,<sup>a</sup> Ai-Xia Zheng,<sup>a</sup> Miao Yu,<sup>a</sup> Hong-Xi  
Li,<sup>a</sup> Zhi-Gang Ren<sup>a</sup> and Jian-Ping Lang<sup>\*a,b</sup>

10

<sup>a</sup> Key Laboratory of Organic Synthesis of Jiangsu province, College of Chemistry, Chemical Engineering and  
Materials Science, Suzhou University, Suzhou 215123, P. R. China. Fax: 86-512-65880089; E-mail: [jplang@suda.edu.cn](mailto:jplang@suda.edu.cn)

15 <sup>b</sup> State Key Laboratory of Organometallic Chemistry, Shanghai Institute of Organic Chemistry, Chinese Academy of  
Sciences, Shanghai 200032, P. R. China

<sup>c</sup> Jiangsu Laboratory of Advanced Functional Materials, Changshu Institute of Technology, Changshu 215500, P. R.  
China

20

<sup>d</sup> School of Pharmaceutical Science, Southern Medical University, Guangzhou, 510515, P. R. China

## Contents

- Fig. S1** Perspective view of 1D chain structure of **3** formed *via* hydrogen bonding interactions. All hydrogen atoms except those involved in hydrogen bonding interactions have been omitted for clarity. ....S3
- 5
- Fig. S2** (a) View of the 2D H-bonded network (extending along the *bc* plane) formed *via* H-bonding interactions in **4**·2(H<sub>2</sub>O)<sub>0.5</sub>. (b) View of the 2D H-bonded network (extending along the *ab* plane) formed *via* H-bonding interactions in **5**·2DMF. All H atoms except the water H atoms and those involved in hydrogen bonds are omitted for clarity. ....S3
- 10 **Fig. S3.** Perspective view of the 1D chain formed by hydrogen bonding interactions in **6**. The hydrogen atoms except those involved in hydrogen bonding interactions have been omitted for clarity. ....S4
- Fig. S4** (a) View of the 2D H-bonded network formed by intermolecular H-bonding interactions in **8**·2DMF·2H<sub>2</sub>O. The hydrogen atoms except those involved in hydrogen bonding interactions have been omitted for clarity; (b) View
- 15 of the 3D structure formed by hydrogen bonding interactions in **8**·DMF·2H<sub>2</sub>O (looking down *b* axis). ....S4

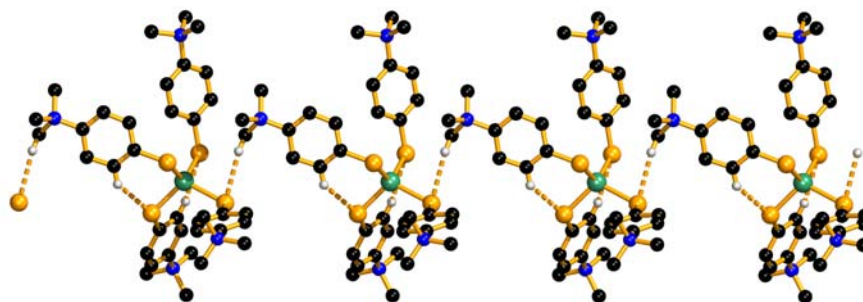

5 **Fig. S1** Perspective view of 1D chain structure of **3** formed *via* hydrogen bonding interactions. All hydrogen atoms except those involved in hydrogen bonding interactions have been omitted for clarity.

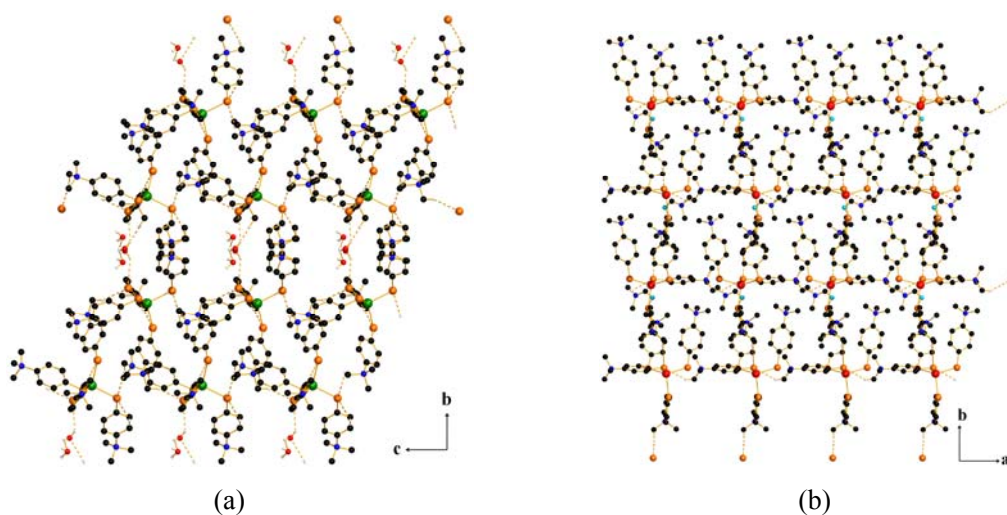

10

**Fig. S2** (a) View of the 2D H-bonded network (extending along the *bc* plane) formed *via* H-bonding interactions in **4**·2(H<sub>2</sub>O)<sub>0.5</sub>. (b) View of the 2D H-bonded network (extending along the *ab* plane) formed *via* H-bonding interactions  
15 in **5**·2DMF. All H atoms except the water H atoms and those involved in hydrogen bonds are omitted for clarity.

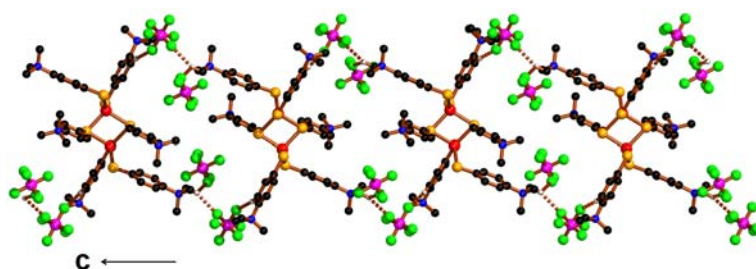

**Fig. S3** Perspective view of the 1D chain formed by hydrogen bonding interactions in **6**. The hydrogen atoms except those involved in hydrogen bonding interactions have been omitted for clarity.

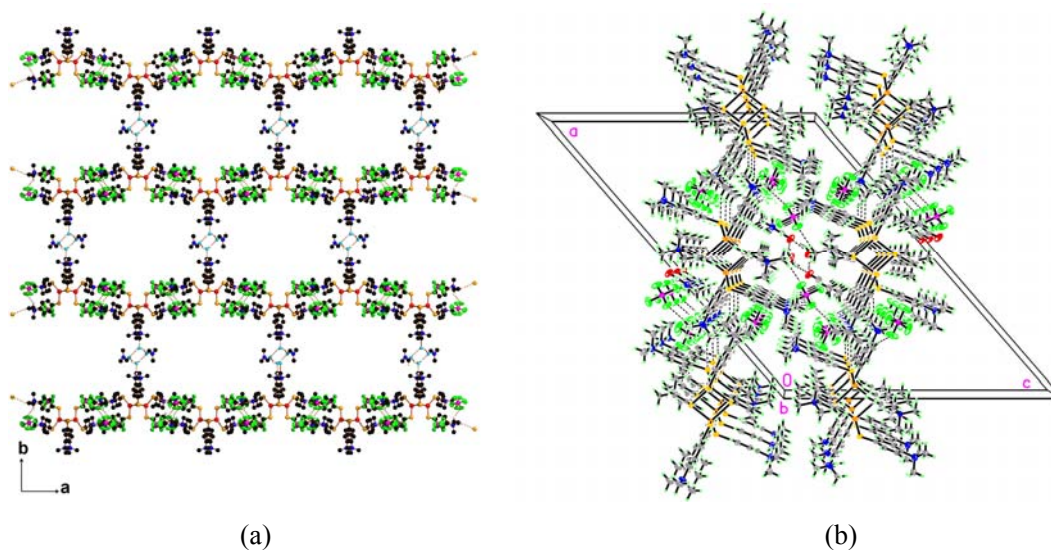

10

**Fig. S4** (a) View of the 2D H-bonded network formed by intermolecular H-bonding interactions in **8**·2DMF·2H<sub>2</sub>O. The hydrogen atoms except those involved in hydrogen bonding interactions have been omitted for clarity; (b) View of the 3D structure formed by hydrogen bonding interactions in **8**·DMF·2H<sub>2</sub>O (looking down *b* axis).
